# Supplementary material
Source: PubMed Central journal article supplement (PMC3965183)
Supplement: NIHMS560953-supplement-ESI.pdf [file NIHMS560953-supplement-ESI.pdf]

## **Electronic Supplementary Information (ESI)**

Interactions between Mesenchymal Stem Cells, Adipocytes, and Osteoblasts in a 3D Tri-Culture Model of Hyperglycemic Conditions in the Bone Marrow Microenvironment

Torri E. Rinker\*<sup>a</sup>, Taymour M. Hammoudi\*<sup>a</sup>, Melissa L. Kemp<sup>a</sup>, Hang Lu<sup>b</sup>, Johnna S. Temenoff<sup>a</sup>

<sup>a</sup>*W.H. Coulter Department of Biomedical Engineering, Georgia Institute of Technology and Emory University, Atlanta, GA 30332, USA. Email: johnna.temenoff@bme.gatech.edu*

<sup>b</sup>*School of Chemical & Biomolecular Engineering, Georgia Institute of Technology, Atlanta, GA 30332, USA*

*\*Both authors contributed equally to this work*

**Fig. S1** Principal Component Analysis (PCA) was conducted to determine if difference in gene expression resulted in clustering of culture configuration or glucose levels prior to further assigning of classes for PLS-DA. (A) PCA for the entire adipocyte gene expression data set yielded two principal components that discriminated adipocytes by culture configuration ( $R^2X = 0.84$ ,  $Q^2 = 0.74$ ). (B) PCA score and loading plots for AAA ( $R^2X = 0.74$ ,  $Q^2 = 0.45$ ), AMA ( $R^2X = 0.65$ ,  $Q^2 = 0.25$ ), and OMA ( $R^2X = 0.74$ ,  $Q^2 = 0.56$ ) cultures yielded one PC. Observed clustering by glucose level warranted further investigated with PLS-DA for AAA. (C) PLS-DA weight plot for AAA model in Fig. 2C.

**Fig. S2** Images were captured using confocal microscopy of calcein (green, live) and ethidium bromide (red, dead) staining in each experimental condition. Merged representative images are presented here. Representative images of adipocytes (A), osteoblasts (B), and MSCs (C) on days 1 and 7 at normal and high glucose conditions in each culture configuration.

**Fig. S3** PCA was conducted within culture configuration datasets to determine if difference in gene expression resulted in clustering glucose levels prior to further assigning of classes for PLS-DA. (A) PCA score and loading plots for OOO ( $R^2X = 0.71$ ,  $Q^2 = 0.52$ ), OMO ( $R^2X = 0.72$ ,  $Q^2 = 0.51$ ), and OMA ( $R^2X = 0.72$ ,  $Q^2 = 0.41$ ) cultures yielded one PC. Observed clustering by glucose level warranted further investigated with PLS-DA for OOO and OMA configuration for classes assigned according to glucose level. (B) PLS-DA weight plot for OOO and OMA models in Fig. 4C.

**Fig. S4** PCA was conducted to determine if difference in gene expression resulted in clustering of culture configuration or glucose levels prior to further assigning of classes for PLS-DA. PCA for the entire MSC gene expression data set yielded two principal components and clustering by culture configuration ( $R^2X = 0.66$ ,  $Q^2 = 0.36$ ).

**Fig. S5** PCA was conducted within culture configuration datasets to determine if difference in gene expression resulted in clustering glucose levels prior to further assigning of classes for PLS-DA. PCA score and loading plots for MMM ( $R^2X = 0.66$ ,  $Q^2 = -0.1$ ), OMO ( $R^2X = 0.73$ ,  $Q^2 = 0.43$ ), AMA ( $R^2X = 0.65$ ,  $Q^2 = 0.42$ ), and OMA ( $R^2X = 0.68$ ,  $Q^2 = 0.02$ ) cultures yielded one PC.

**Fig. S6** Observed clustering by glucose level warranted further investigated with PLS-DA for OMO and AMA culture configurations with classes assigned according to glucose level. PLS-DA score and weight plot for OMO ( $R^2Y = 0.82$ ,  $Q^2 = 0.73$ ) and AMA ( $R^2Y = 0.62$ ,  $Q^2 = 0.41$ ).

A

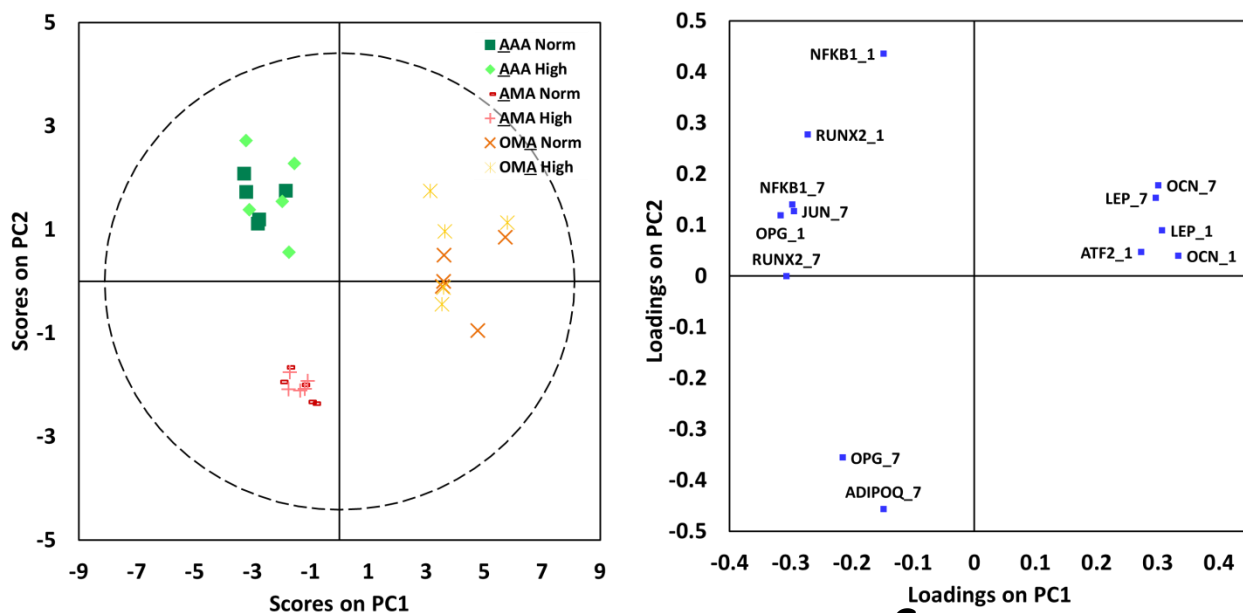

B

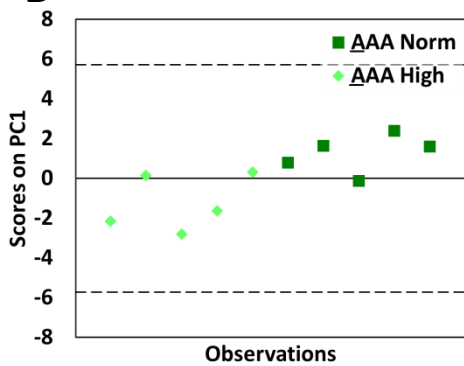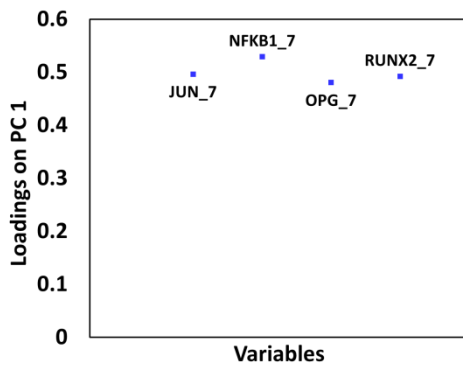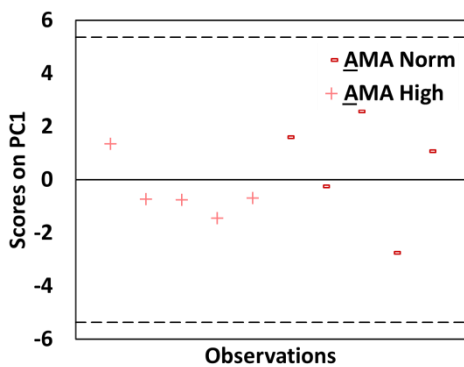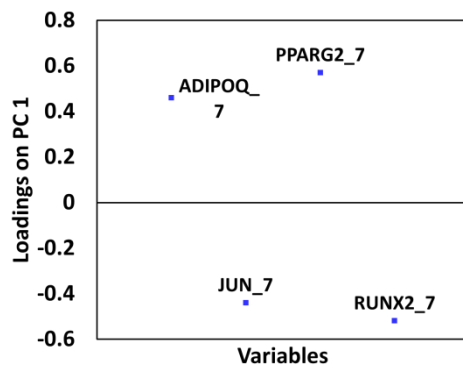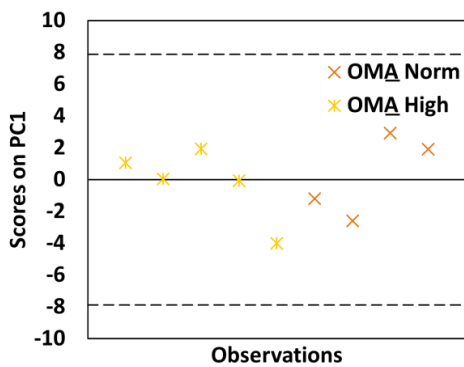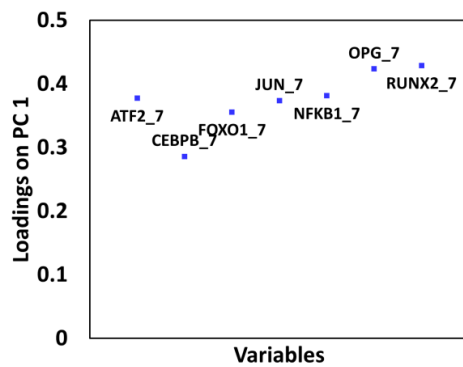

C

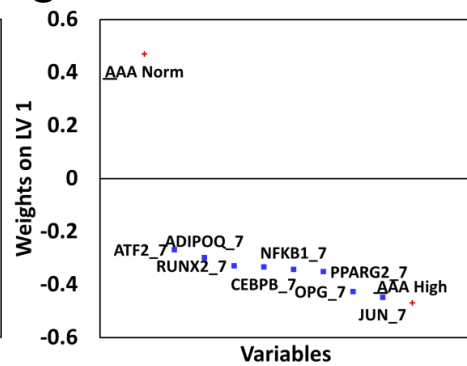

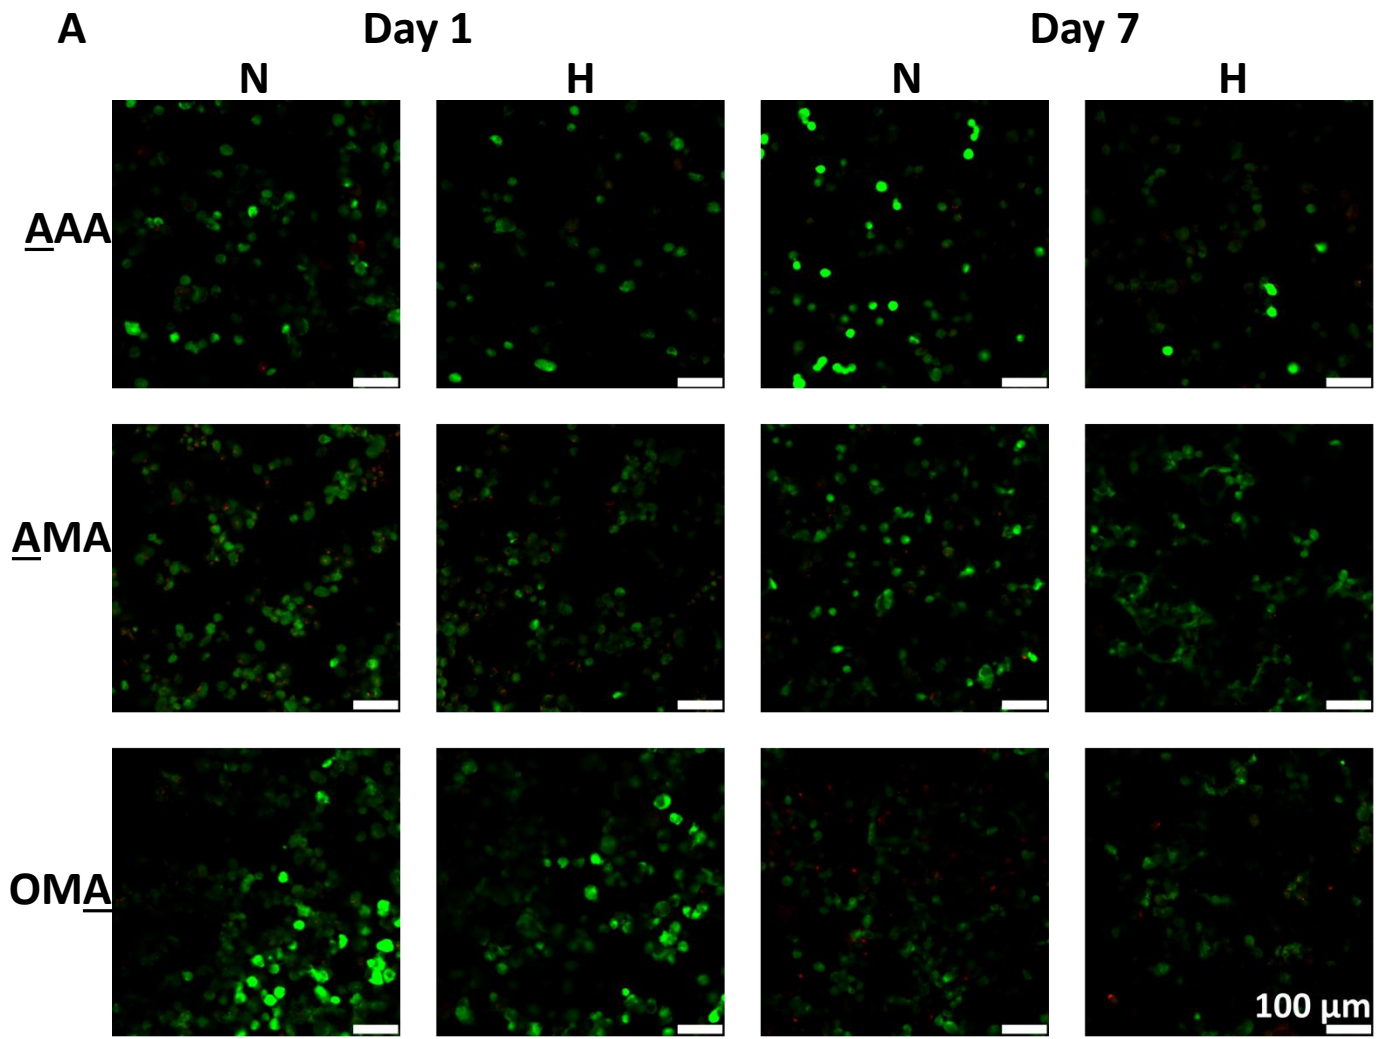

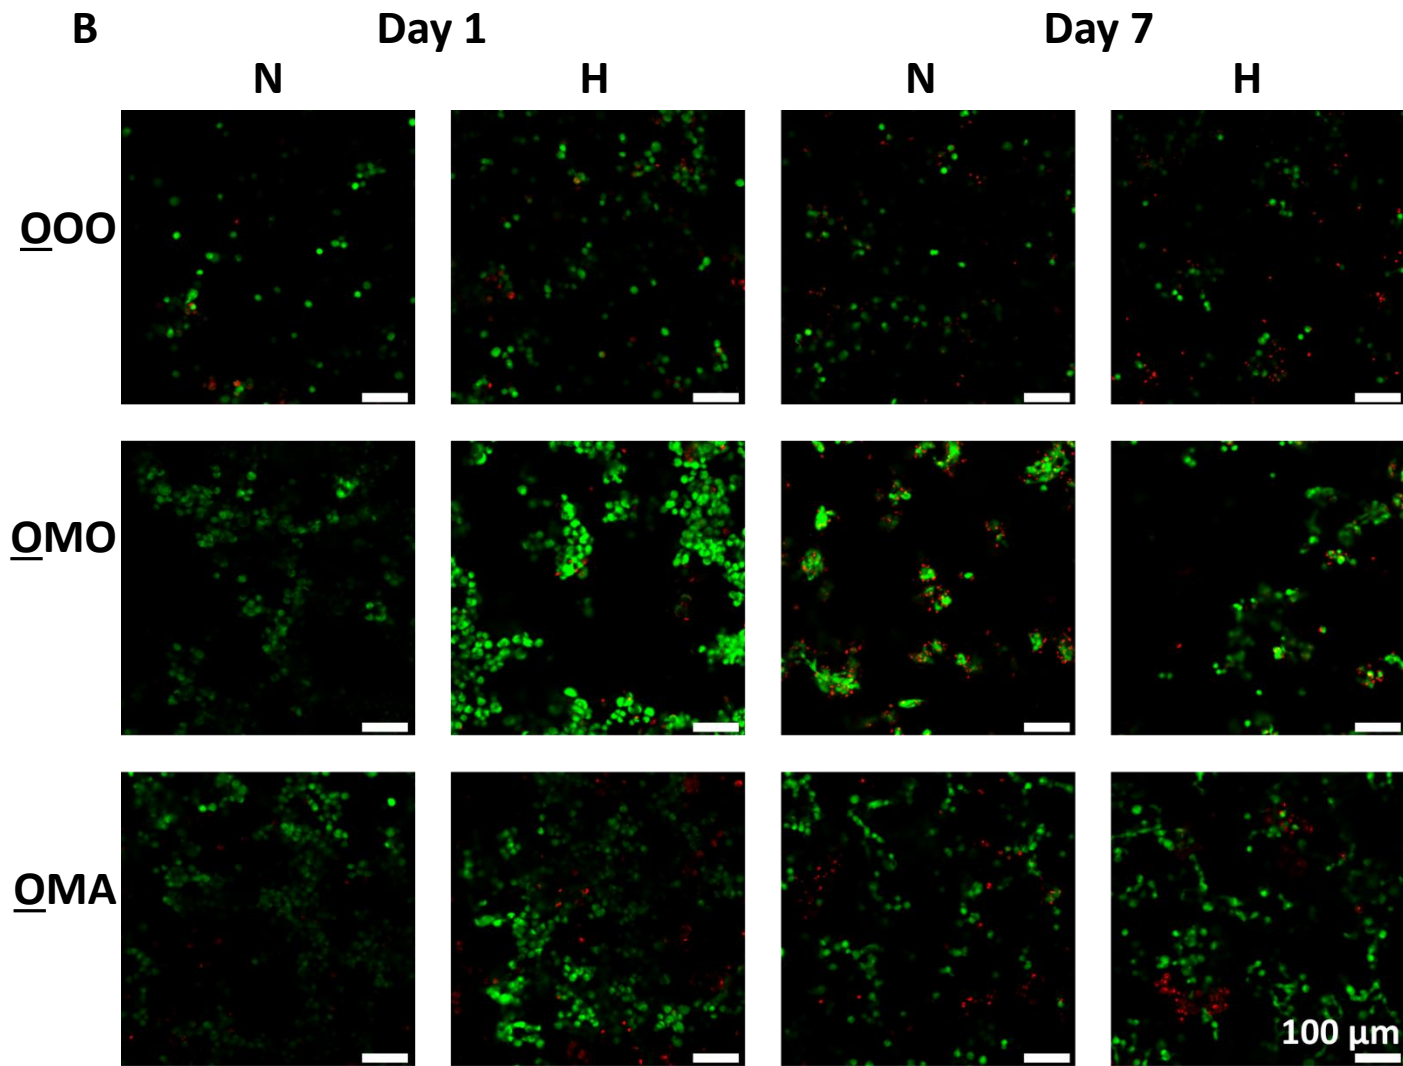

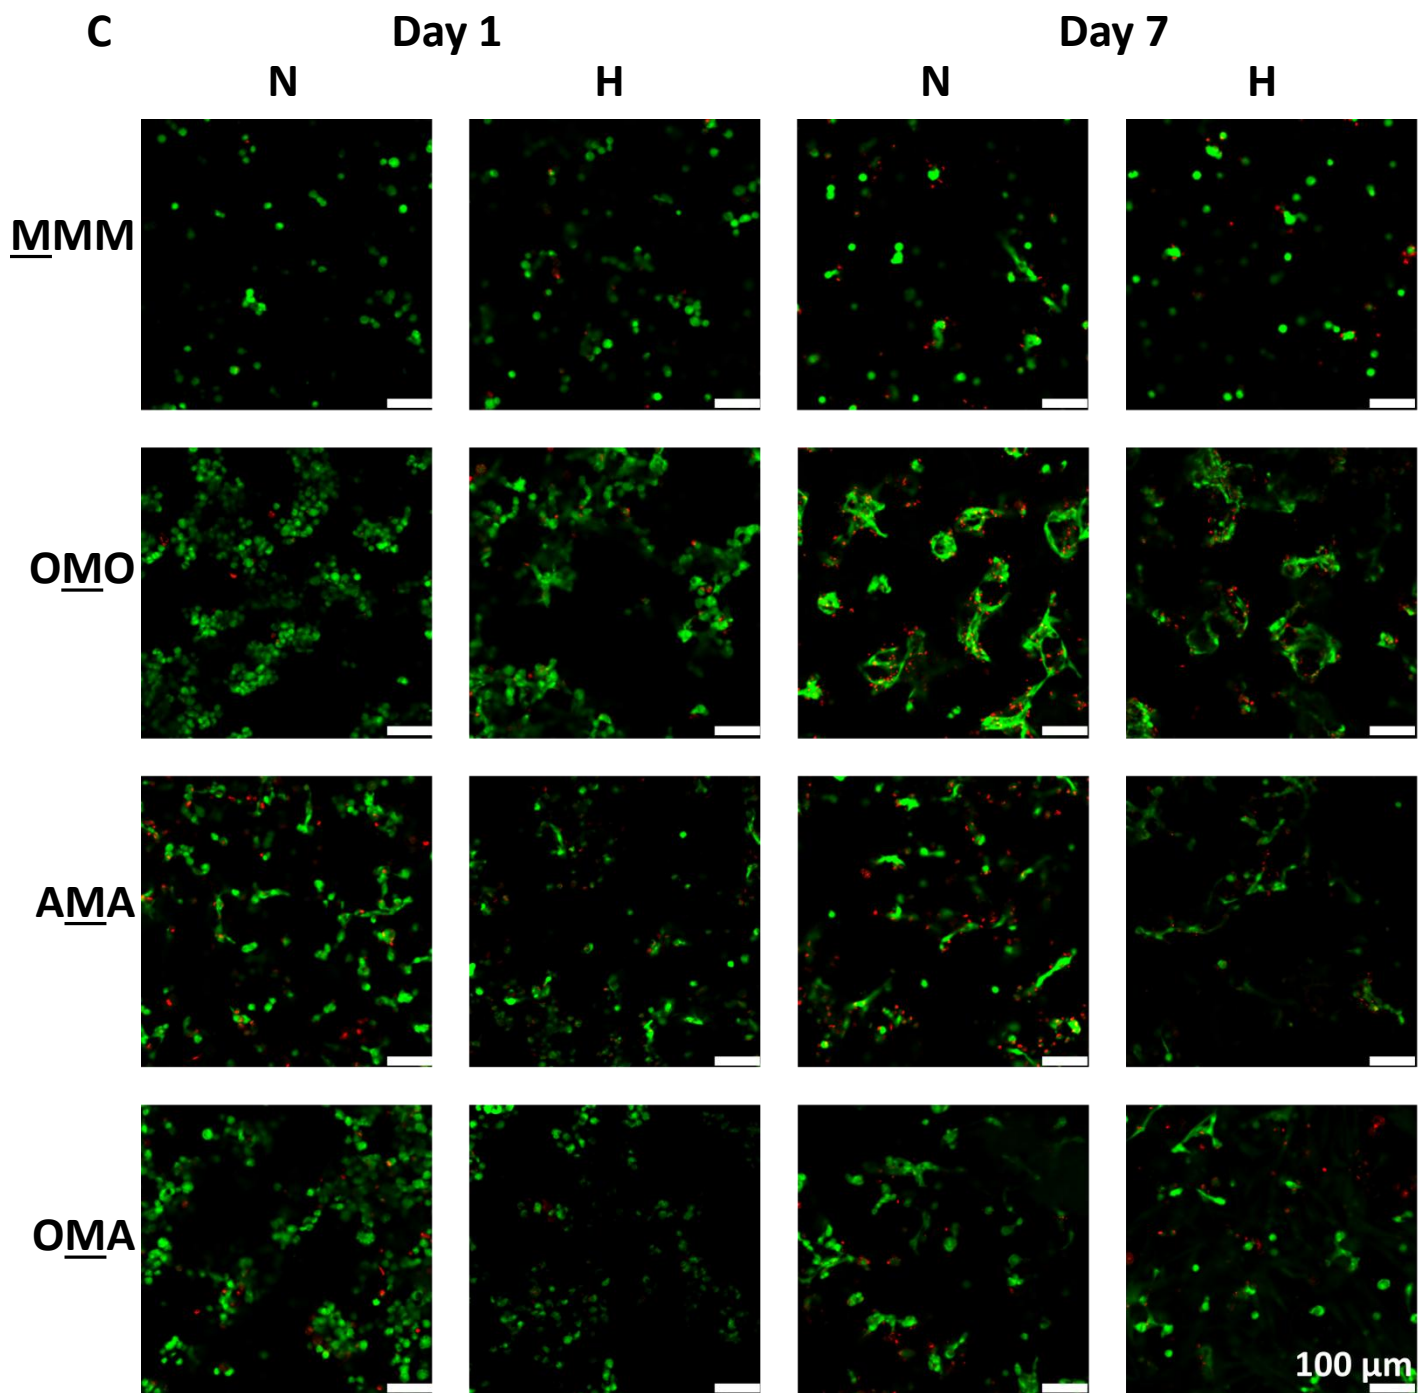

**A**

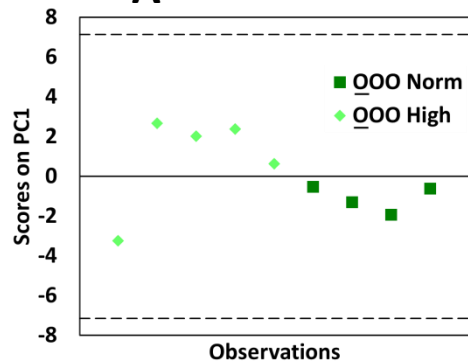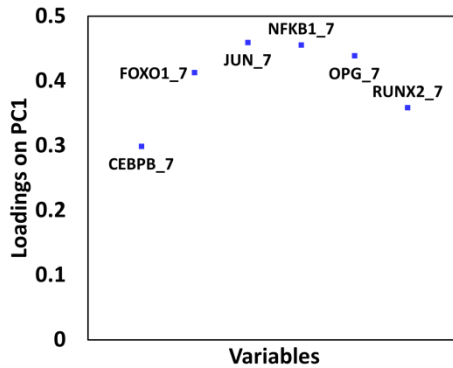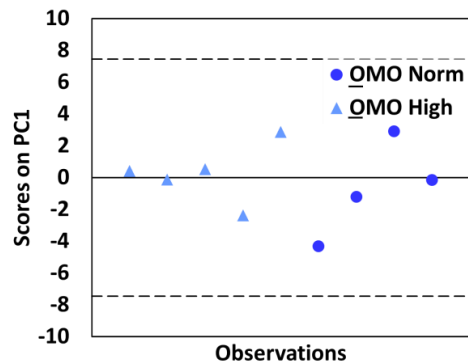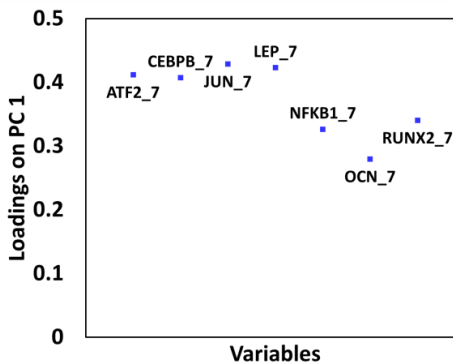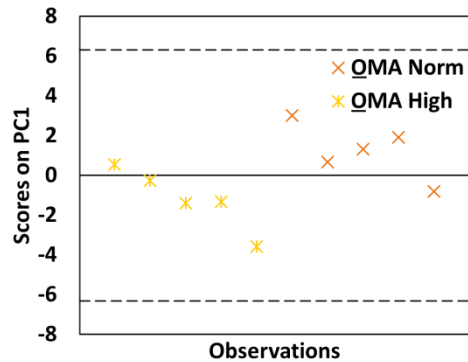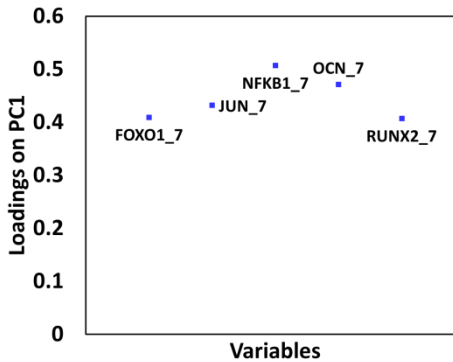

**B**

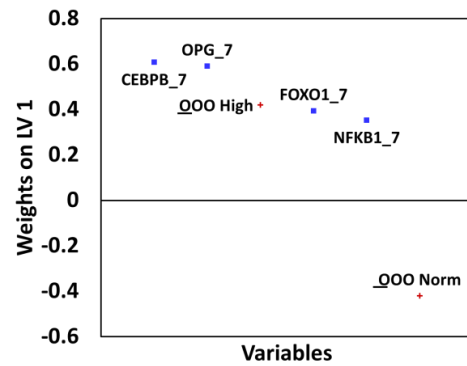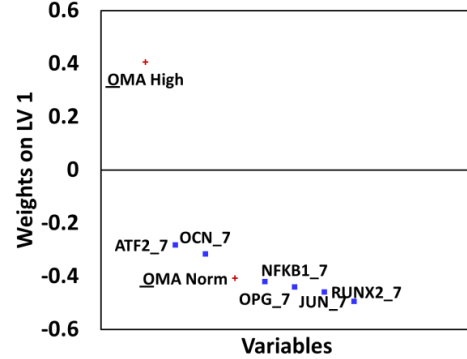

Figure S4

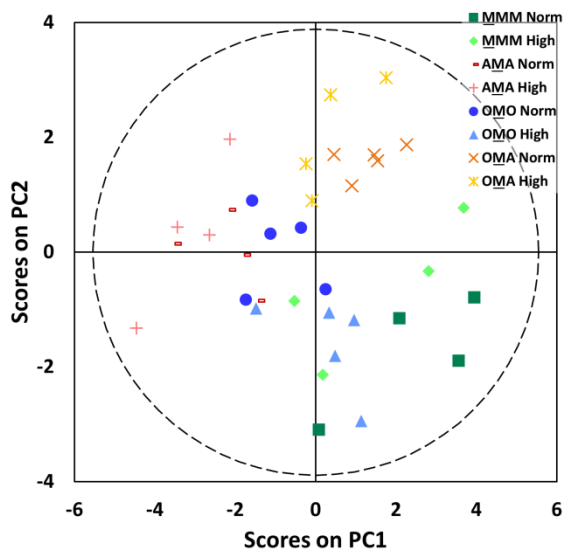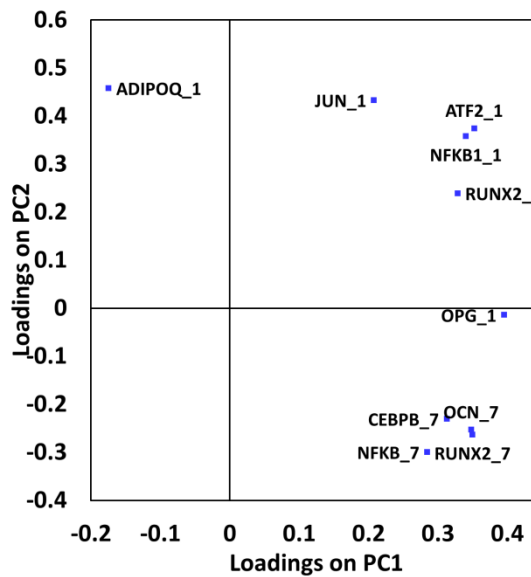



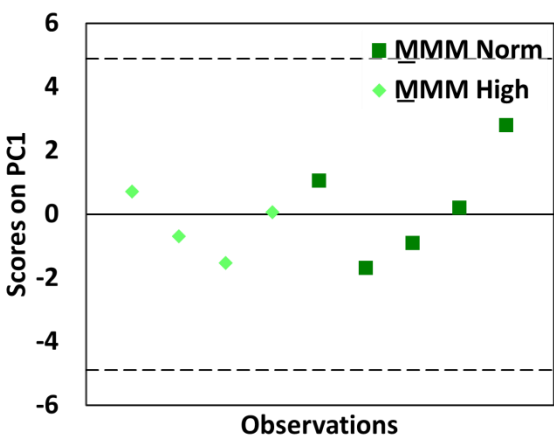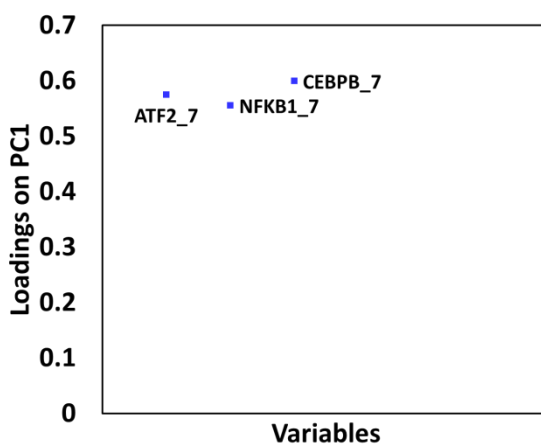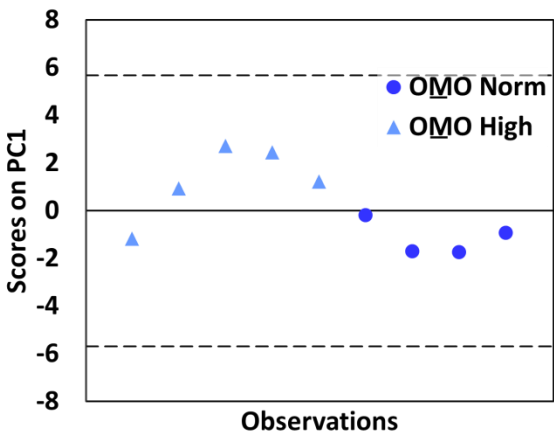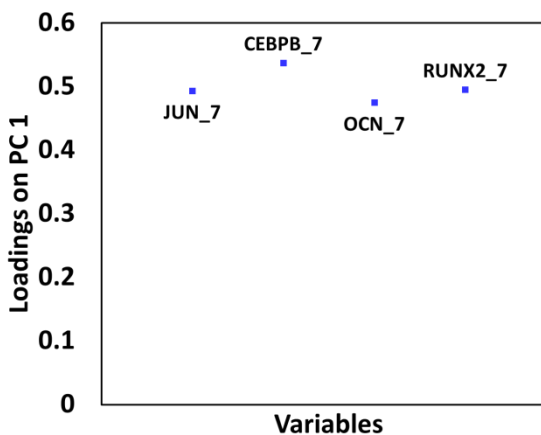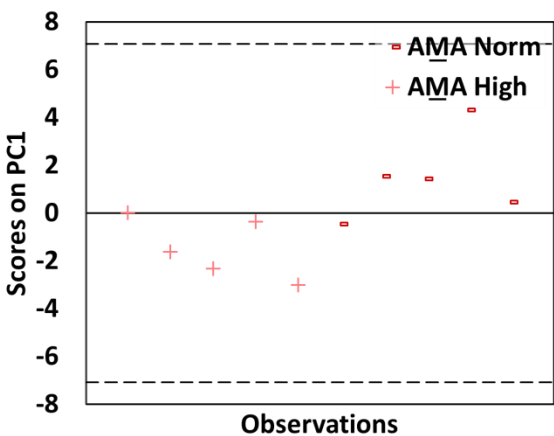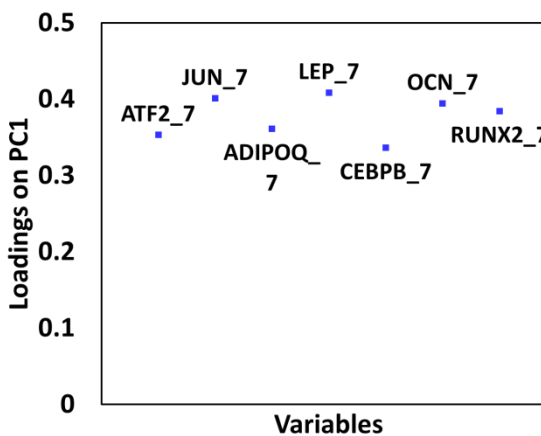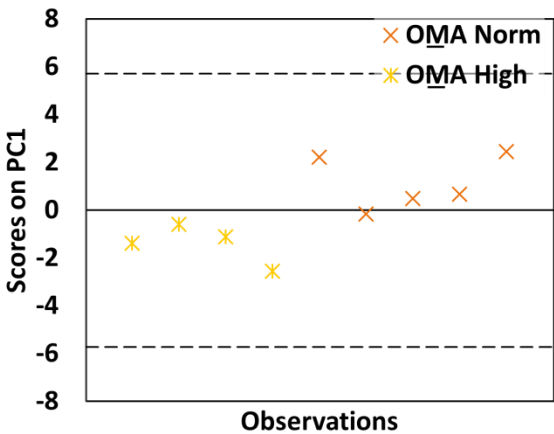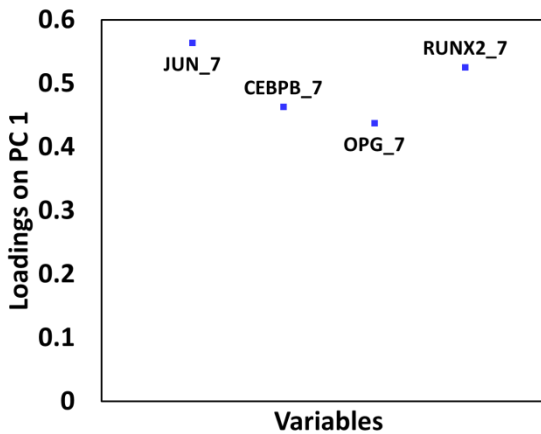

Figure S6

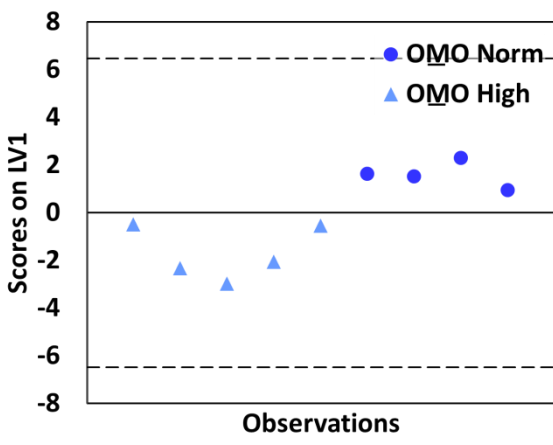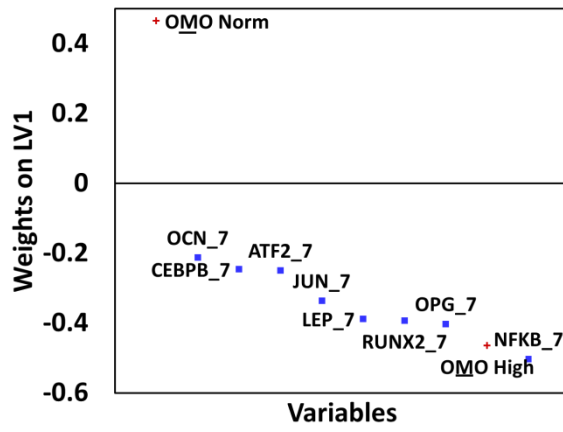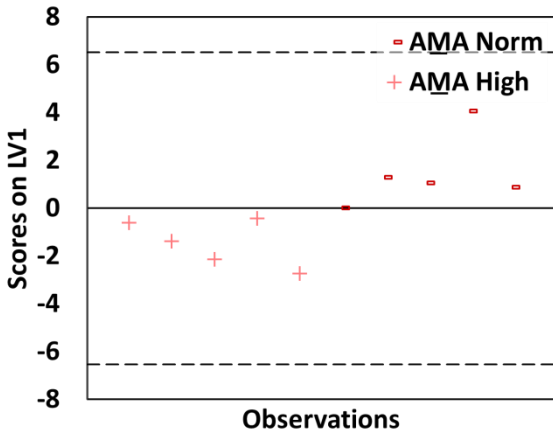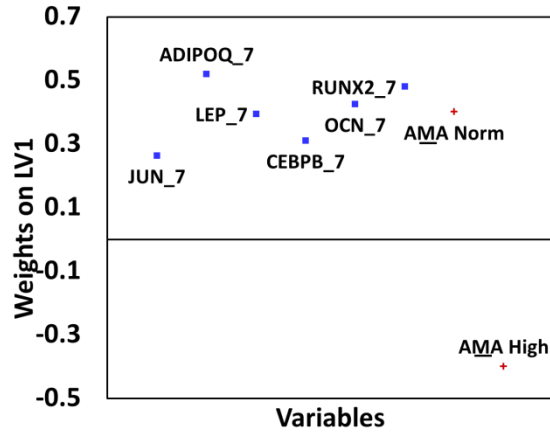

**Table S1.** National Library of Medicine accession number and primer sequences for target genes in qPCR.

| Target Gene | Accession Number | Primer Set (Forward, Reverse) |
|-------------|------------------|-------------------------------|
| RUNX2       | NM_001024630     | TTTGACTGGGTTCATGTGTT          |
|             |                  | TGGCTGCATTGAAAAGACTG          |
| OCN         | NM_199173        | GTGCAGAGTCCAGCAAAGGT          |
|             |                  | AGCAGAGCGACACCCTAGAC          |
| OPG         | NM_002546        | CGGGAAAGAAAGTGGGAGCAGAAG      |
|             |                  | CGTCTTTGAGTGCTTTAGTGCGTG      |
| PPARG2      | NM_015869        | TCCATGCTGTTATGGGTGAA          |
|             |                  | GGGAGTGGTCTTCCATTACG          |
| CEBPB       | NM_005194        | CGAGTCAGAGCCGCGCAC            |
|             |                  | GCAGGGGGAGACATGCTGGG          |
| LEP         | NM_000230        | ACCCTGTGCGGATTCTTGTGGCTTTGG   |
|             |                  | GGCTCTGCCTACCCCTCTGCCCT       |
| ADIPOQ      | NM_001177800     | ATCTGGTTGGGGTGGGCTCCTTAC      |
|             |                  | GTTGACTCTCTCTGTGCCTCTGGTT     |
| ATF2        | NM_001880        | GGTCCTTCTCTCCCAACCAGTA        |
|             |                  | CTGTAGTGGATGTGGCTGGCTGT       |
| JUN         | NM_002228        | GACAGACACAGCCAGCCAGCCAG       |
|             |                  | GGACTCTCCGAAACACCAGCCC        |
| FOXO1       | NM_002015        | GCTACCAATAACCCAGCCCCAA        |
|             |                  | AATGCCAGGTTGGTCTGTTGCA        |
| NFKB1       | NM_003998        | AGACAAAAGTGGGCTACTCTGGCG      |
|             |                  | TGAGAGGTGGTCTTCACTGGGCT       |
| RPS18       | NM_022551        | CGATGGGCGGCGGAAAATAGCCTTGC    |
|             |                  | CAGTGGTCTTGGTGTGCTGGCCTCGG    |
| ACTB        | NM_001101        | GCAGTCGGTTGGAGCGAGCATCCCC     |
|             |                  | TCCCCTGTGTGGACTTGGGAGAGGAC    |
